# Supplementary material for: Using a multi-criteria approach for a regional differentiation of the likelihood of future volcanic activity in Germany
Source: Copernicus journal article supplement (doi:10.5194/sand-2-143-2023), 2023-09-06
Supplement: Supplementary file 1 [file sand-2-143-2023-supplement.pdf]

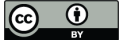

*Supplement of*

## **Using a multi-criteria approach for a regional differentiation of the likelihood of future volcanic activity in Germany**

**Lisa Rummel et al.**

*Correspondence to:* Lisa Rummel (lisa.rummel@bgr.de)

The copyright of individual parts of the supplement might differ from the article licence.

The background of the slide is a photograph of a volcanic eruption. A massive, billowing plume of white and grey ash and steam rises from a dark, rocky landscape. The sky is overcast with grey clouds, and a bright light source, likely the sun, is visible through a break in the clouds, creating a lens flare effect. The foreground shows a dark, rocky slope leading up to the base of the volcano.

# Using a multi-criteria approach for a regional differentiation of the likelihood of future volcanic activity in Germany

**SafeND 2023**

Lisa Rummel  
Alexander Bartels, Franz May

14.09.2023

# Motivation

Ausgeschlossene Gebiete nach Anwendung der Ausschlusskriterien gemäß § 22 Standortauswahlgesetz

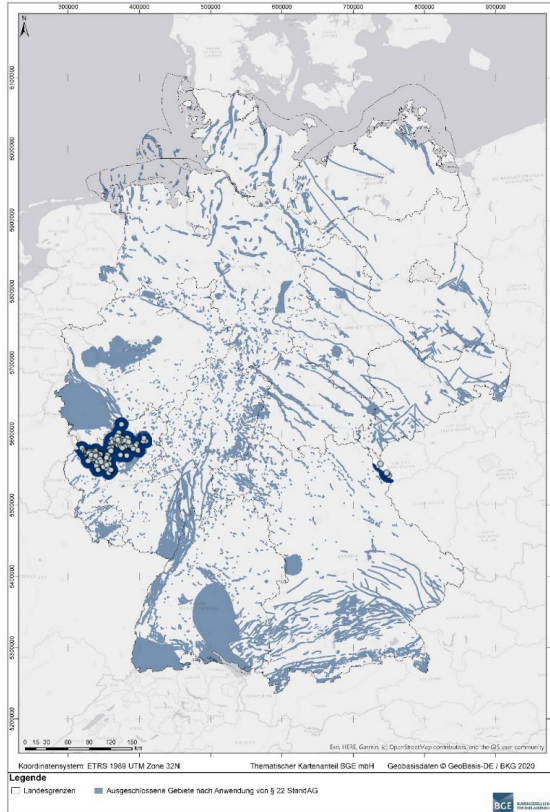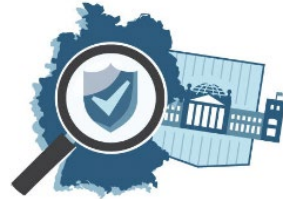

## German Repository Site Selection Act (StandAG, 2017)

An area is not suitable as repository site for highly radioactive waste if Quaternary volcanism is present or future volcanic activity is expected (1 million years)

**now:** Considering Quaternary volcanoes, but not possible future scenarios for volcanism

# Motivation

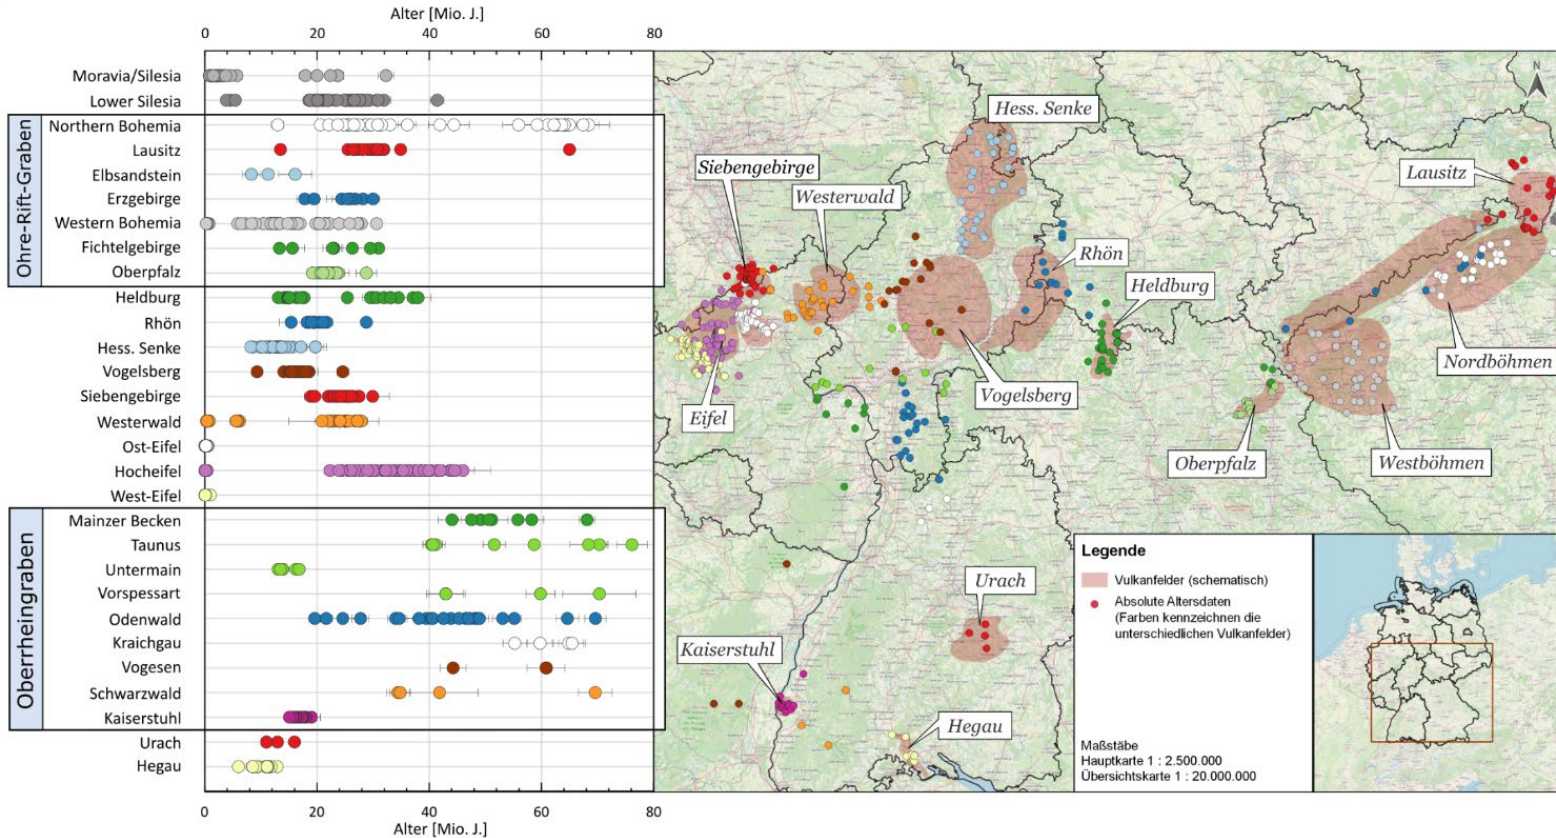

# Objectives

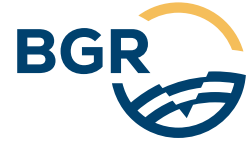

- Development of a **Germany-wide** applicable **method** to differentiate areas of possible future volcanic activity
- Considering a variety of geoscientific **indicators** and related **parameters**, which may promote volcanism and/or show its long-term evolution
- **Combination** of all **parameters** to a semi-quantitative **index**, whose spatial value distribution can be used for the **hazard assessment** of future **volcanism**

# Indicators

## Expert surveys:

- Volcanism in Germany
- Possible indicators
- Quantification of indicators (parameters)

→ 30 indicators have been identified

## Top 10 (according to expert surveys)

- DLF-Earthquakes
- Geochronological data
- Geochemical and isotopic analysis of mantle fluids and gases
- Earthquake swarms
- Occurrence of Cenozoic volcanic rocks
- Teleseismic anomalies in the mantle
- Fumaroles and bicarbonate water
- Ground motion
- Neotectonic activity
- Faults and sutures

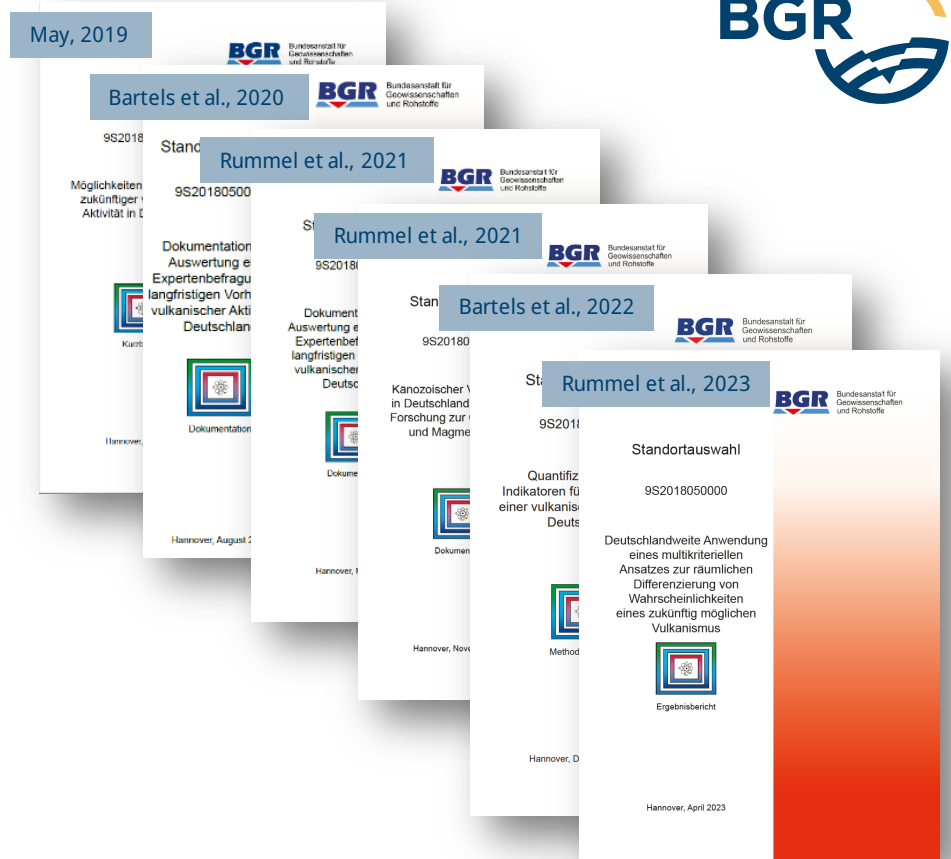

[https://www.bgr.bund.de/DE/Themen/Endlagerung/Produkte/produkte\\_node.html?tab=Standortauswahl](https://www.bgr.bund.de/DE/Themen/Endlagerung/Produkte/produkte_node.html?tab=Standortauswahl)



# Quantification of indicators

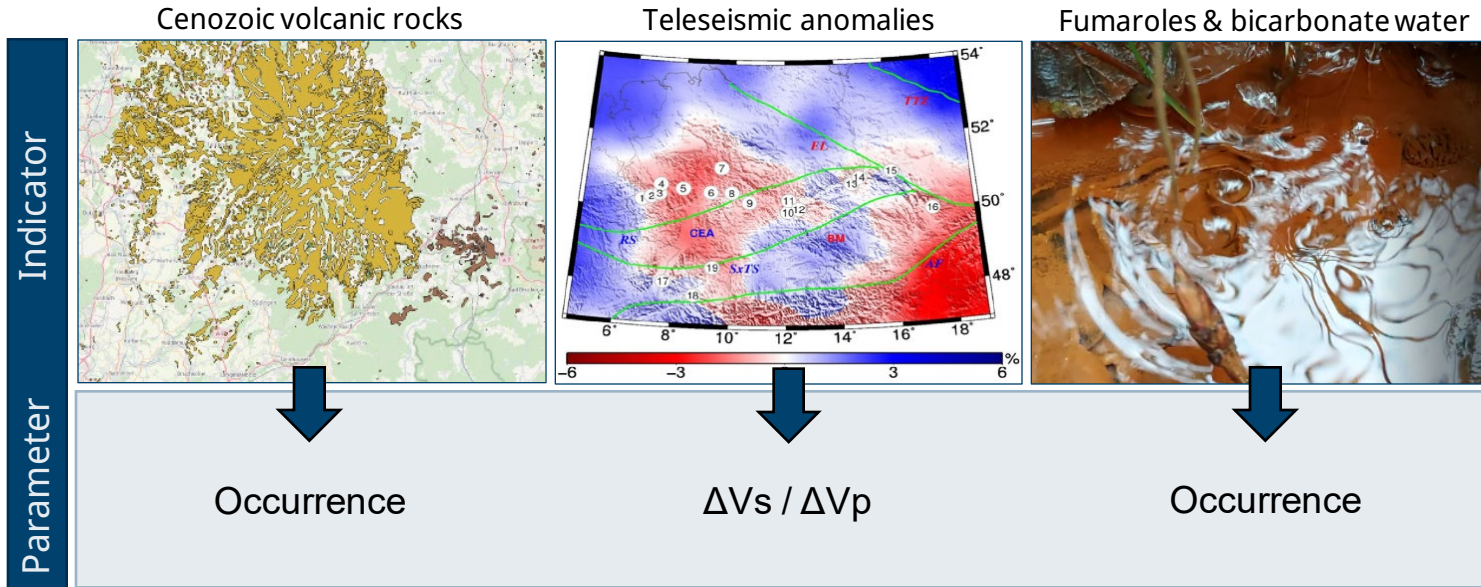

- Re-evaluation of indicators
- Evaluation of available data
- Resolution / uncertainties
- Defining threshold values

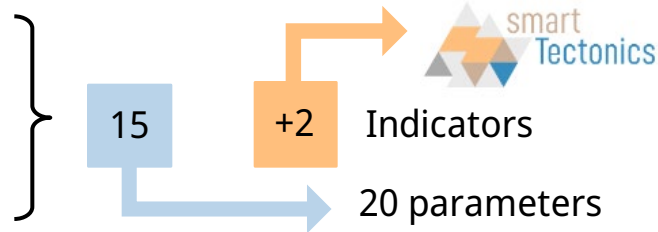

# Quantification of indicators

## Seismic anomalies in the earth's mantle

- Mineralogy
  - Temperature
  - Water content
  - Melt content
- Defining a quantifiable property

**Parameter:**  $\Delta V_s$

( $\Delta V_{s_{\min}}$ , 60 - 90 km depth)

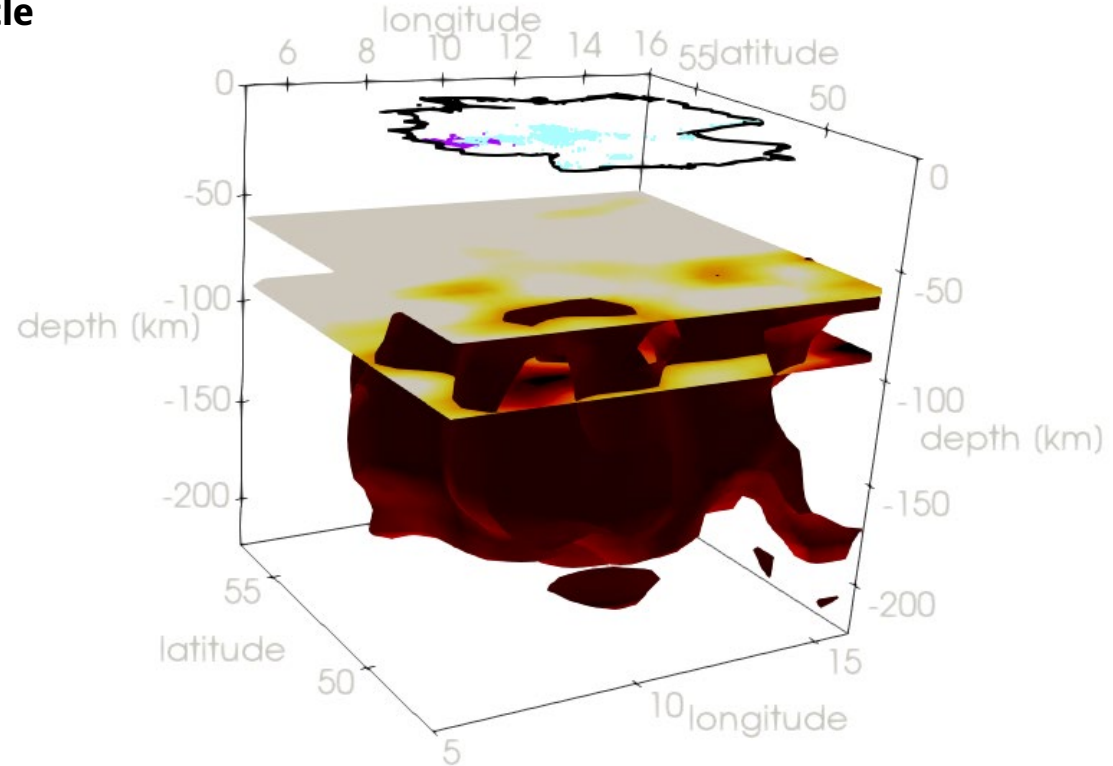



# Quantification of indicators

## Seismic anomalies in the earth's mantle

- Mineralogy
- Temperature
- Water content
- Melt content

→ Defining a quantifiable property

**Parameter:  $\Delta V_s$**   
( $\Delta V_{s_{\min}}$ , 60 - 90 km depth)

- Data processing
- Determination of relevant values by defined threshold values
- Standardization of values

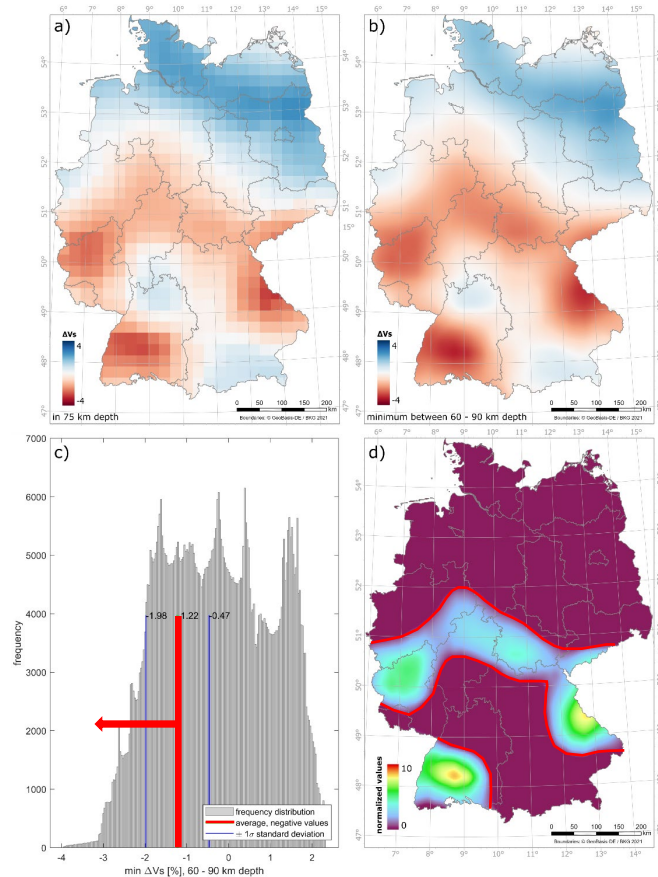

# Quantification of indicators

**Parameter:  $\Delta V_s$**

( $\Delta V_{s_{\min}}$ , 60 - 90 km depth)

- Combination of datasets

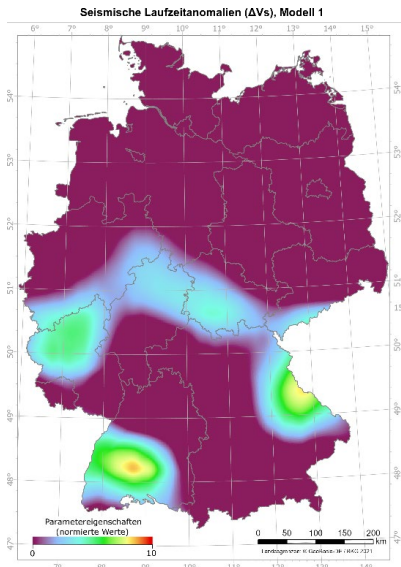

Fichtner et al., 2018

+

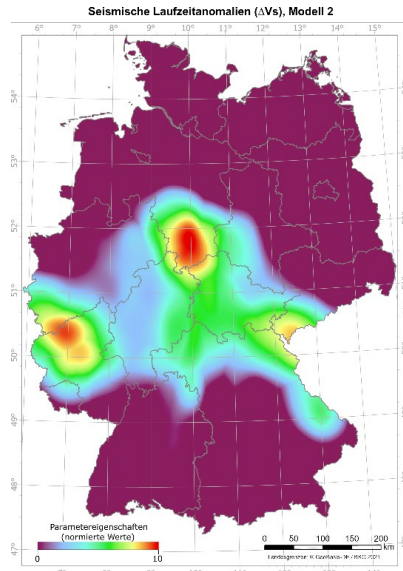

Zhu et al., 2015

=

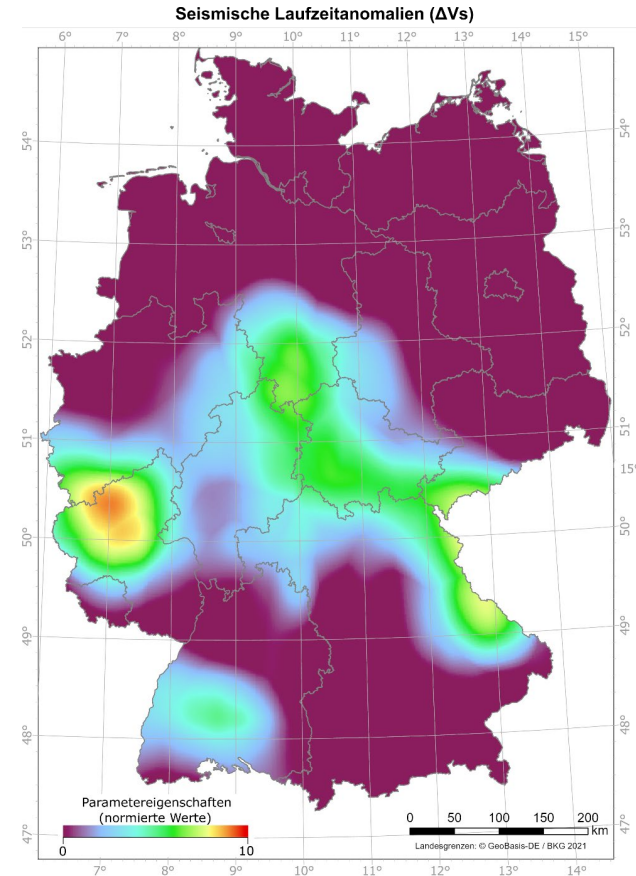

# Quantification of indicators

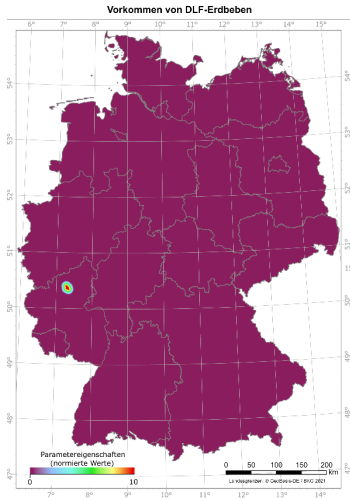

DLF-Earthquakes

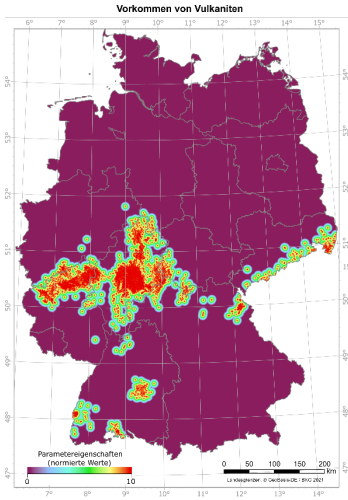

Cenozoic volcanic  
rocks

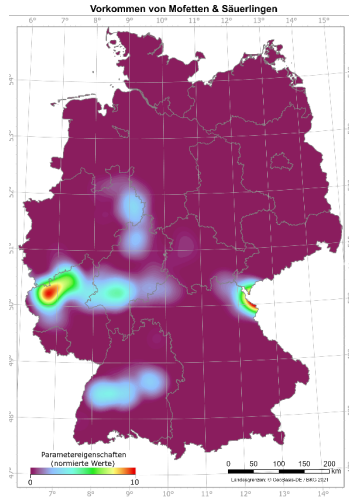

Bicarbonate water  
& fumaroles

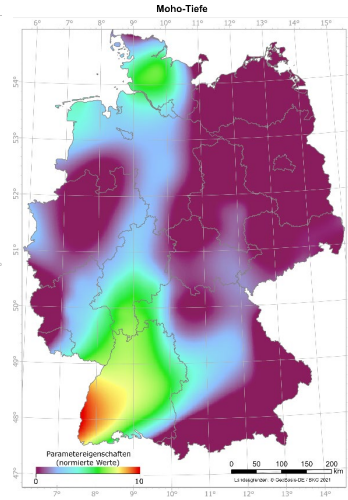

Moho depth

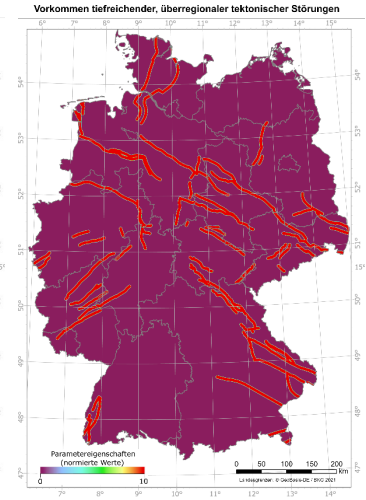

Faults

# Quantification of indicators

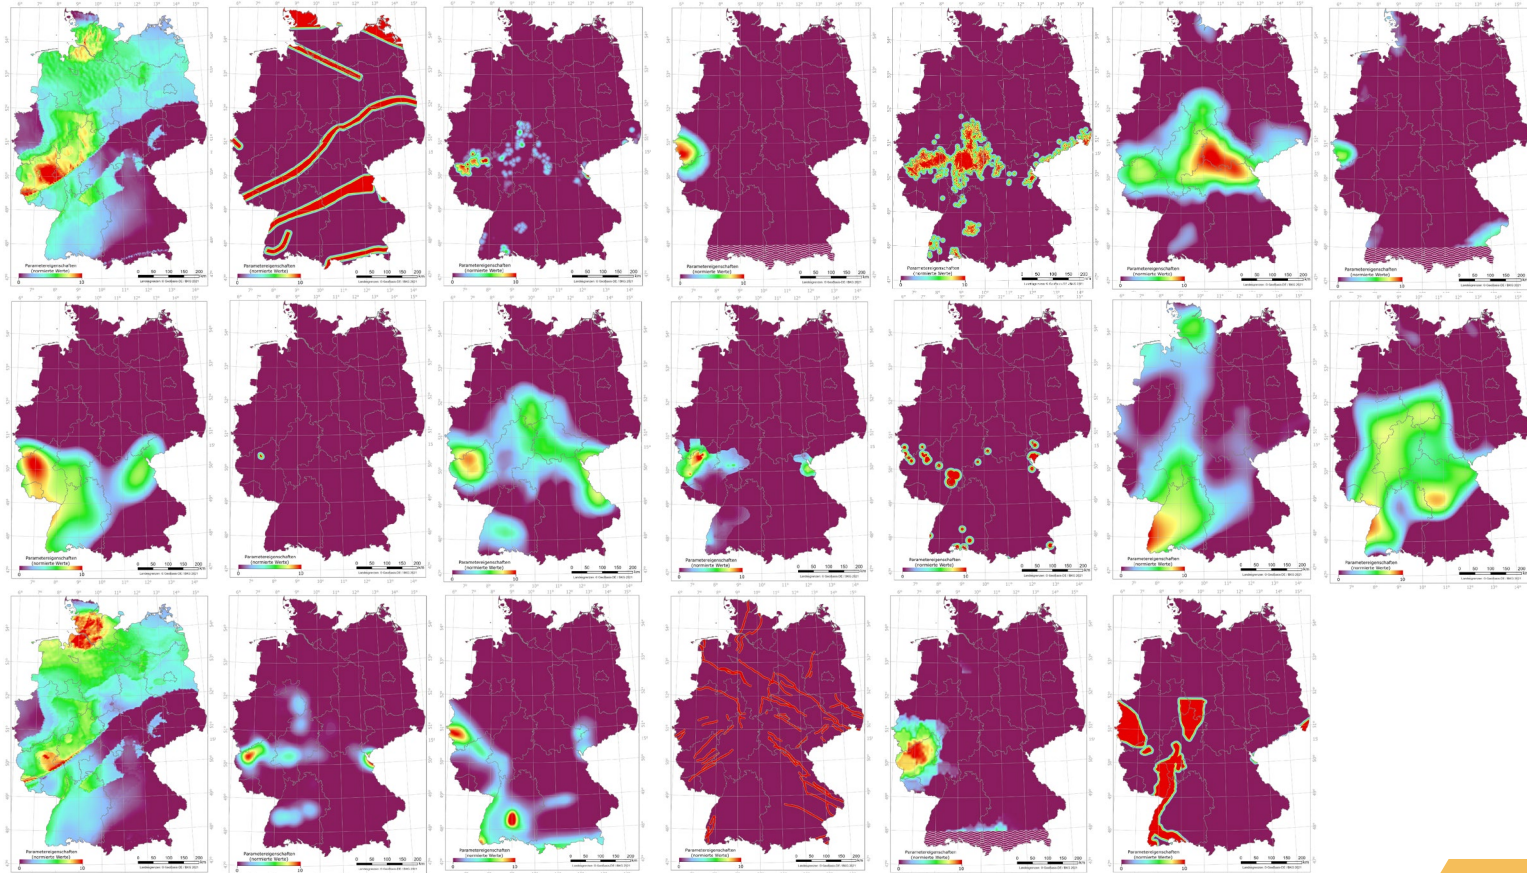



# Combination of parameters

- Starting with a white map
- Germany-wide application of parameters
- Combination of parameters to an overall index

## ➔ Possible hazard map

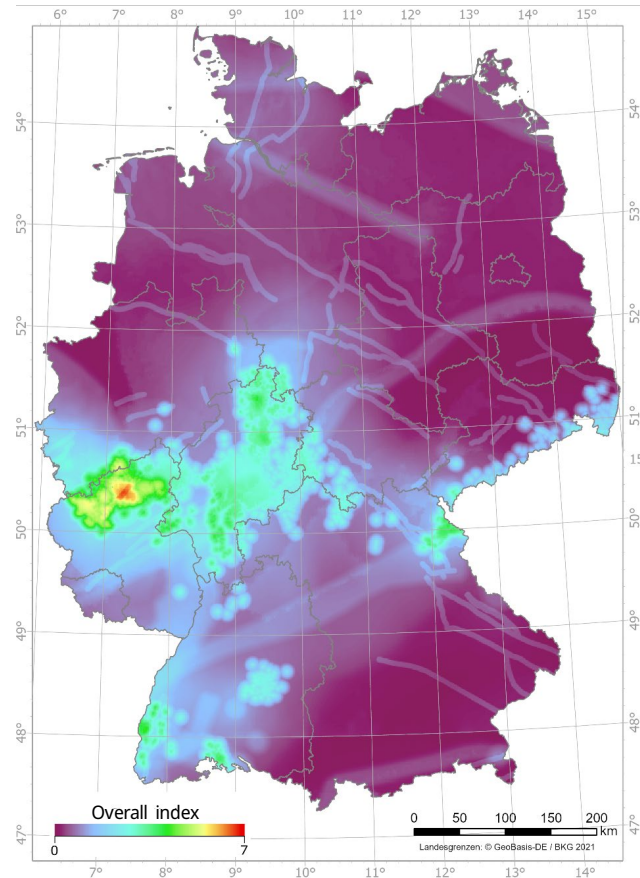

# Results

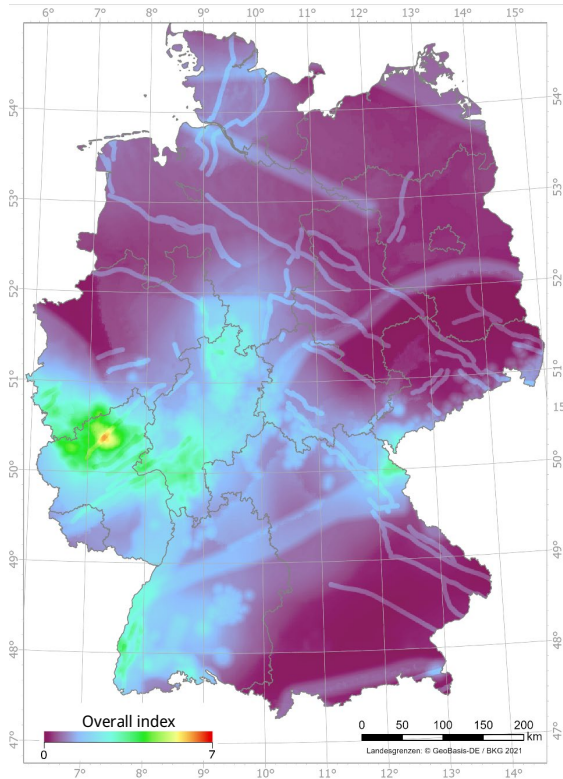

Weighted sum according to expert surveys

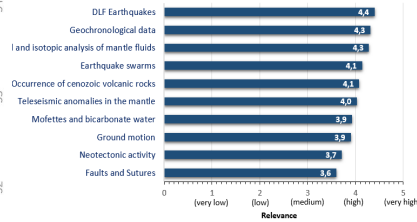

Weighted sum according to expert surveys

+

Considering process categories

- 1) melt generation
- 2) pathways
- 3) volcanism

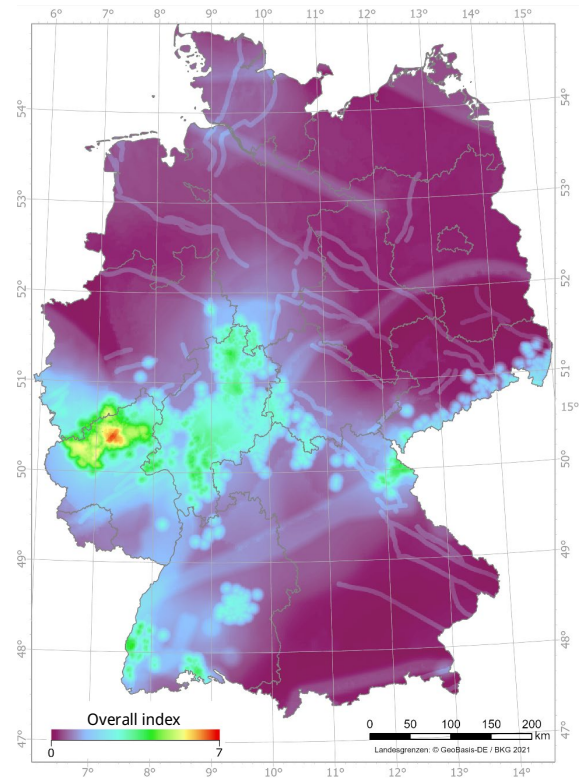



# Results

Determining the degree of subjectivity of the results:

- Using random weighting factors
- Average of 1,000 index calculations

→ Results are comparable with those computed using the output of expert surveys

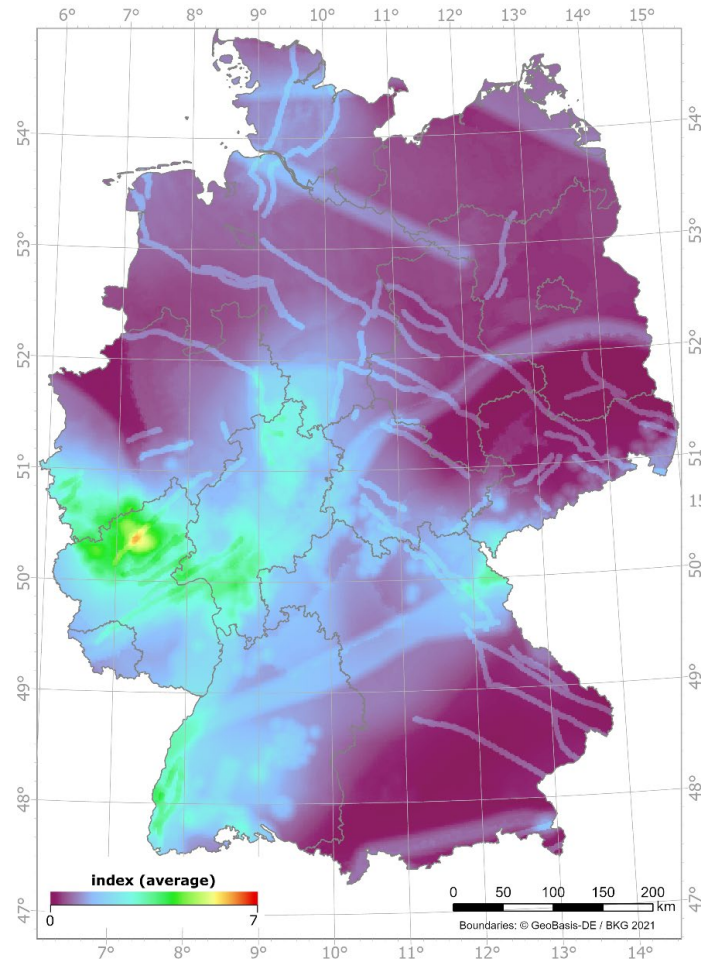

# Differentiation of areas

- Spatial differentiation of the likelihood of future volcanism by evaluating the index values
- Fixed categories vs. continuous value distribution
- **When is a value critical?**

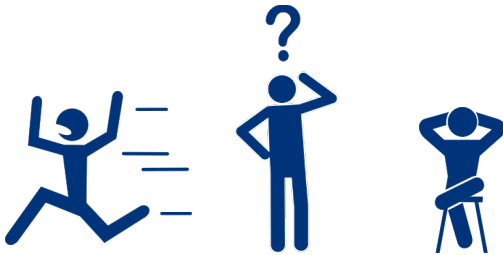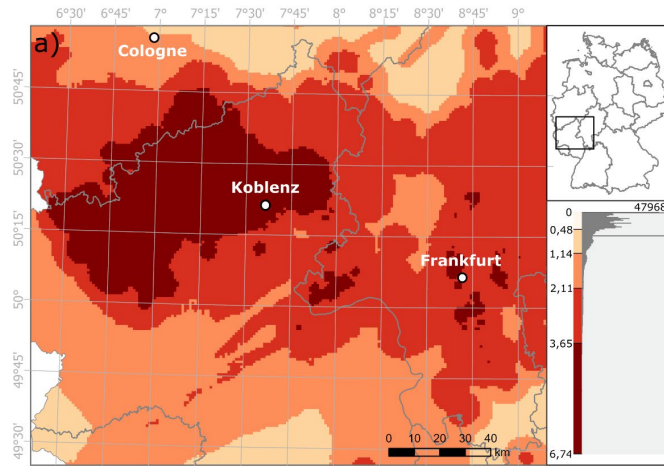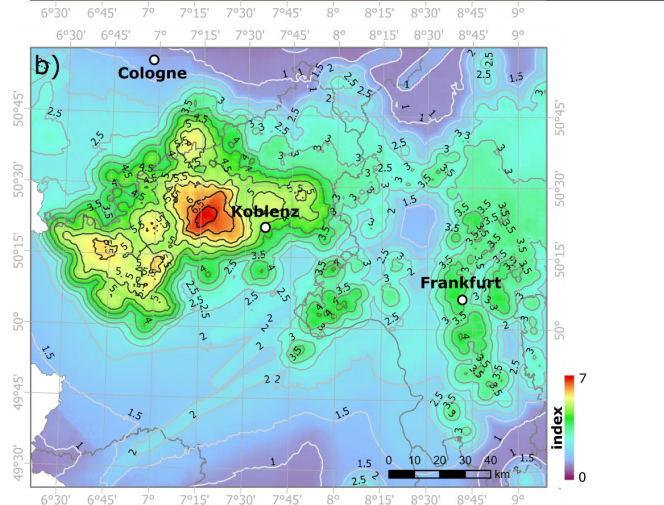

# Summary

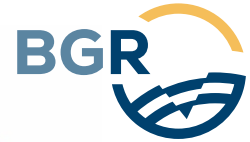

- Germany-wide collection of data that may provide information about future volcanism
- A multi-criteria approach to forecast most probable regions of future volcanic eruptions in Germany
- 20 parameters were quantified and evaluated using threshold values
- A calculated index is used to quantify the likelihood of possible future volcanic activity within certain areas in Germany
- Results show an elevated risk of future volcanic activity in regions beside the Quaternary volcanic fields

**Thank you for your attention!**
